# Supplementary material
Source: Springer Nature journal article supplement (https://www.springermedizin.de/resource/supplementary/12985_2010_1008_MOESM9_ESM.pdf/9608936)

# A dsRNA replication centers and newly synthesized viral protein

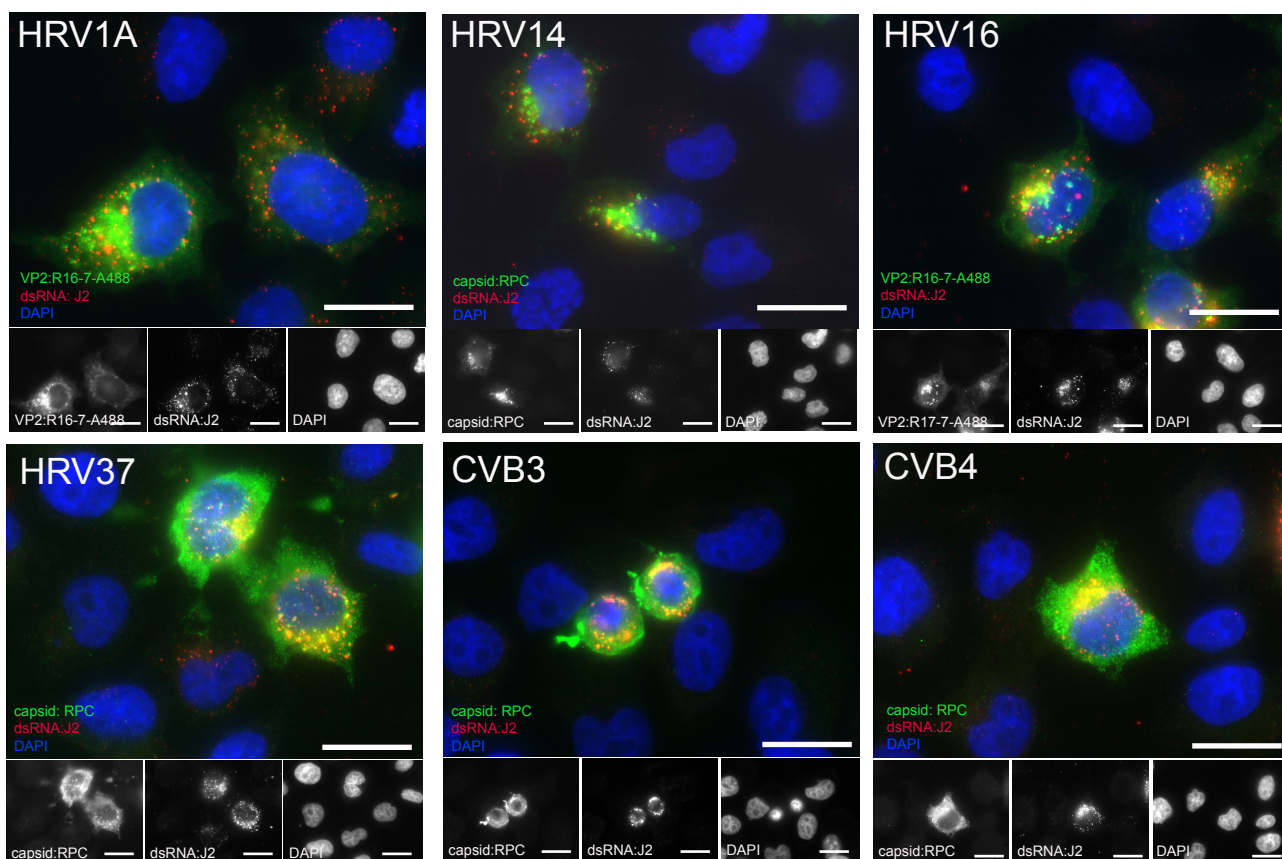

# B moi dependent dsRNA replication centers

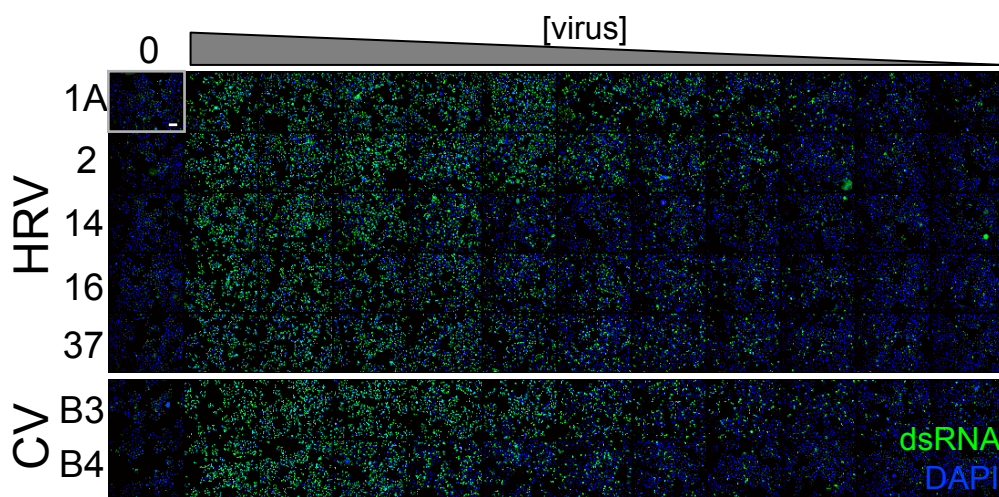

# C automated image analysis for high content screening

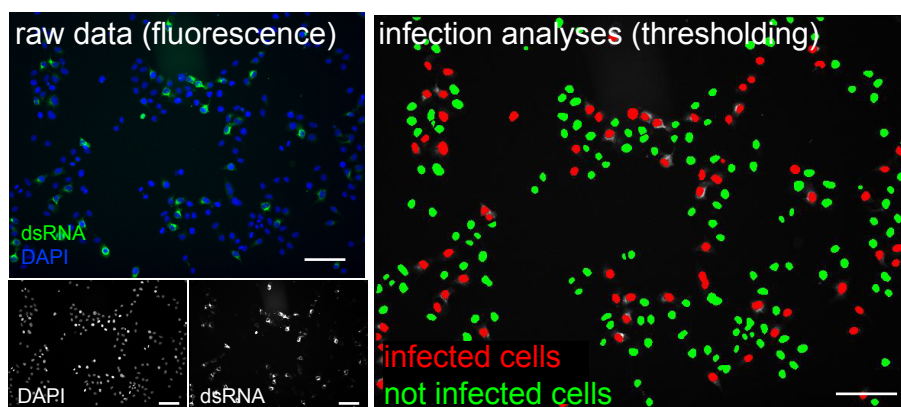

# D moi dependent infection scoring

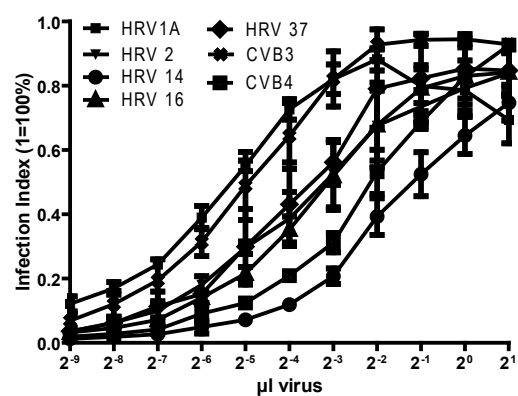

Supplement: MOESM9 [file 9608936]
